# Supplementary material for: Design, synthesis, and characterization of pyridine-containing organic crystals with different substitution positions using solvothermal method
Source: Royal Society of Chemistry journal article supplement (doi:10.1039/d1ce00165e), 2021-01-01
Supplement: d1ce00165e1.pdf [file d1ce00165e1.pdf]

## Synthesis, preparation and characterization of pyridine-containing organic crystals with different substitute position using solvothermal method

### Synthesis of TBOP

A mixture of 2-vinylpyridine (20.0 mmol, 2.2 mL), 2,8-dibromo-6*H*,12*H*-5,11-methanodibenzo [*b,f*] [1,5] diazocine (5.0 mmol, 1.9 g), K<sub>2</sub>CO<sub>3</sub> (20.0 mmol, 2.8 g), palladium acetate (0.001 mmol, 0.0023 g) and tris(2-methylphenyl) phosphine (0.001 mmol, 0.003 g) in NMP (10 mL) was stirred at 130 °C for 10 h under N<sub>2</sub> atmosphere. The reaction mixture was cooled to room temperature and extracted by CH<sub>2</sub>Cl<sub>2</sub> for three times. The combined organic layer was washed with water, dried over anhydrous MgSO<sub>4</sub> and concentrated under reduced pressure. The residue was purified by a silica gel column chromatography (eluent: CH<sub>2</sub>Cl<sub>2</sub>/Ethanol = 50/1 in the ratio of volume) to afford **TBOP** (0.84 g, 1.96 mmol) in 39% yield as a light yellow solid. <sup>1</sup>H NMR (400 MHz, DMSO-*d*<sub>6</sub>), δ ppm: 8.53 (d, *J* = 3.9 Hz, 2H), 7.72-7.77 (m, 2H), 7.54 (d, *J* = 16.2 Hz, 2H), 7.45 (d, *J* = 7.8 Hz, 4H), 7.17- 7.26 (m, 6H), 7.13 (d, *J* = 7.2 Hz, 2H), 4.67 (d, *J* = 16.5 Hz, 2H), 4.27 (s, 2H), 4.18 (d, *J* = 16.8 Hz, 2H). <sup>13</sup>C NMR (75.47 MHz, DMSO-*d*<sub>6</sub>), δ ppm 155.56, 149.88, 148.95, 137.19, 132.15, 132.08, 128.84, 127.21, 126.29, 126.09, 125.53, 122.59, 122.55, 66.66, 58.62. HRMS (ESI-TOF) *m/z*: [M+H]<sup>+</sup> Calcd for C<sub>29</sub>H<sub>24</sub>N<sub>4</sub> 429.20737; Found 429.20694.

### Synthesis of TBMP

First, 3-vinylpyridine was synthesized according to literature. A mixture of 3-vinylpyridine (20.0 mmol, 2.2 mL), 2,8-dibromo-6*H*,12*H*-5,11-methanodibenzo [*b,f*] [1,5] diazocine (5.0 mmol, 1.9 g), K<sub>2</sub>CO<sub>3</sub> (20.0 mmol, 2.8 g), palladium acetate (0.001 mmol, 0.0023 g) and tris(2-methylphenyl) phosphine (0.001 mmol, 0.003 g) in NMP (10 mL) was stirred at 130 °C for 10 h under N<sub>2</sub> atmosphere. The reaction mixture was cooled to room temperature and extracted by CH<sub>2</sub>Cl<sub>2</sub> for three times. The combined organic layer was washed with water, dried over anhydrous MgSO<sub>4</sub> and concentrated under reduced pressure. The residue was purified by a silica gel column chromatography (eluent: CH<sub>2</sub>Cl<sub>2</sub>/Ethanol = 50/1 in the ratio of volume) to afford **TBMP** (0.84 g, 1.96 mmol) in 39.4% yield as a light yellow solid. <sup>1</sup>H NMR (400 MHz, DMSO-*d*<sub>6</sub>), δ ppm 8.69 (s, 2H), 8.41 (d, *J* = 4 Hz, 2H), 7.97 (d, *J* = 8.0 Hz, 2H), 7.41 (d, *J* = 9.6 Hz, 2H), 7.36 (d, 2H, *J* = 8 Hz, 2H), 7.25 (d, *J* = 16.5 Hz, 2H), 7.21 (s, 2H), 7.15 (d, *J* = 8.4 Hz, 2H), 7.10 (d, *J* = 16.5 Hz, 2H), 4.67 (d, *J* = 16.7 Hz, 2H), 4.26 (s, 2H), 4.18 (d, *J* = 16.7 Hz, 2H). <sup>13</sup>C NMR (101 MHz, DMSO-*d*<sub>6</sub>), δ ppm 148.24, 148.14, 148.07, 132.95, 132.51, 132.02, 130.07, 128.38, 125.54, 125.19, 125.07, 123.81, 123.57, 66.26, 58.21. HRMS (ESI-TOF) *m/z*: [M+H]<sup>+</sup> Calcd for C<sub>29</sub>H<sub>24</sub>N<sub>4</sub> 429.20737; Found 429.20697.

### General organic chemical synthesis of PHZOP

A solution of **TBOP** (0.193 g, 0.45 mmol) in a mixture of trifluoroacetic anhydride (0.5 mL, 3.6 mmol) and dichloromethane (1 mL) was stirred under a nitrogen atmosphere at room temperature for 1 h. The reaction was quenched with water and basified with saturated sodium hydrogen carbonate solution. The reaction mixture was extracted with dichloromethane (3 x 50 mL) and the organic layers were combined and washed with brine, dried over anhydrous sodium sulfate and distilled under reduced pressure to give

a red solid. The red solid was dissolved in alkaline ethanol solution (100 mg sodium hydroxide dissolved in 5 mL ethanol) and stirred at room temperature until completion (TLC). The reaction mixture dissolved in a mixture of water and dichloromethane. The organic layer was dried over anhydrous sodium sulfate, filtered and concentrated under reduced pressure. Then, the residue was purified by a silica gel column chromatography (eluent: CH<sub>2</sub>Cl<sub>2</sub>/Ethanol = 100/1 in the ratio of volume) to afford brown-red solid **PHZOP** (0.059 g, 31.5%). <sup>1</sup>H NMR (400 MHz, DMSO-*d*<sub>6</sub>) δ 8.49 (d, *J* = 4.0 Hz, 2H), 7.73-7.68 (m, 2H), 7.48 (d, *J* = 16.0 Hz, 2H), 7.42 (d, *J* = 7.9 Hz, 2H), 7.25-7.23 (m, 4H), 7.16-7.13 (m, 2H), 6.95 (d, *J* = 16.0 Hz, 2H), 6.62 (d, *J* = 8.5 Hz, 2H), 6.40 (t, 2H), 4.50 (s, br, 4H). <sup>13</sup>C NMR (101 MHz, DMSO-*d*<sub>6</sub>) δ 155.83, 149.35, 136.61, 132.29, 131.45, 126.88, 124.87, 124.54, 122.95, 121.46, 121.35, 117.12, 48.33. HRMS (ESI-TOF) *m/z*: [M+H]<sup>+</sup> Calcd for C<sub>28</sub>H<sub>24</sub>N<sub>4</sub> 417.20737; Found 417.20673.

### General organic chemical synthesis of PHZMP

A solution of **TBMP** (0.193 g, 0.45 mmol) in a mixture of trifluoroacetic anhydride (0.5 mL, 3.6 mmol) and dichloromethane (1 mL) was stirred under a nitrogen atmosphere at room temperature for 1 h. The reaction was quenched with water and basified with saturated sodium hydrogen carbonate solution. The reaction mixture was extracted with dichloromethane (3 x 50 mL) and the organic layers were combined and washed with brine, dried over anhydrous sodium sulfate and distilled under reduced pressure to give a red solid. The red solid was dissolved in alkaline ethanol solution (100 mg sodium hydroxide dissolved in 5 mL ethanol) and stirred at room temperature until completion (TLC). The reaction mixture dissolved in a mixture of water and CH<sub>2</sub>Cl<sub>2</sub>. The organic layer was dried over anhydrous sodium sulfate, filtered and concentrated under reduced pressure. Then, the residue was purified by a silica gel column chromatography (eluent: CH<sub>2</sub>Cl<sub>2</sub>/Ethanol = 100/1 in the ratio of volume) to afford brown-red solid **PHZMP** (0.063 g, 3%). <sup>1</sup>H NMR (400 MHz, DMSO-*d*<sub>6</sub>) δ 8.66 (t, *J* = 10.9 Hz, 2H), 8.36 (d, *J* = 4.1 Hz, 2H), 7.93 (d, *J* = 8.2 Hz, 2H), 7.31 (d, *J* = 6.4 Hz, 4H), 7.14 (m, 4H), 6.89 (m, 2H), 6.66 (m, 2H), 6.34 (s, 1H), 5.22 (s, 1H), 4.40 (s, br, 4H). <sup>13</sup>C NMR (101 MHz, DMSO-*d*<sub>6</sub>) δ 149.14, 147.72, 133.59, 131.94, 131.05, 128.89, 126.43, 125.35, 124.61, 123.76, 119.63, 117.18, 48.47. HRMS (ESI-TOF) *m/z*: [M+H]<sup>+</sup> Calcd for C<sub>28</sub>H<sub>24</sub>N<sub>4</sub> 417.20737; Found 417.20676.

**Table S1** Solution systems and products from solvothermal experiments.

| DMF/<br>H <sub>2</sub> O | Product                                | MeOH/<br>H <sub>2</sub> O | Product                                                                        | EtOH/<br>H <sub>2</sub> O | Product                                                                        |
|--------------------------|----------------------------------------|---------------------------|--------------------------------------------------------------------------------|---------------------------|--------------------------------------------------------------------------------|
| 1:0                      | Amor. <b>TBOP</b> /Amor. <b>TBMP</b>   | 1:0                       | Amor. <b>TBOP</b> /Amor. <b>TBMP</b>                                           | 1:0                       | Amor. <b>TBOP</b> /Amor. <b>TBMP</b>                                           |
| 2:8                      | Amor. <b>TBOP</b> /Amor. <b>TBMP</b>   | 2:8                       | Amor. <b>TBOP</b> +Cysr. <b>TBOP</b> /<br>Amor. <b>TBMP</b> +Cysr. <b>TBMP</b> | 2:8                       | Amor. <b>TBOP</b> +Cysr. <b>TBOP</b> /<br>Amor. <b>TBMP</b> +Cysr. <b>TBMP</b> |
| 3:7                      | Crys. <b>PHZOP</b> /Crys. <b>PHZMP</b> | 3:7                       | Crys. <b>TBOP</b> /Amor. <b>TBMP</b>                                           | 3:7                       | Crys. <b>TBOP</b> /Amor. <b>TBMP</b>                                           |
| 4:6                      | Crys. <b>PHZOP</b> /Crys. <b>PHZMP</b> | 4:6                       | Crys. <b>TBOP</b> /Cysr. <b>TBMP</b>                                           | 4:6                       | Crys. <b>TBOP</b> /Cysr. <b>TBMP</b>                                           |
| 5:5                      | Amor. <b>TBOP</b> /Amor. <b>TBMP</b>   | 5:5                       | Crys. <b>TBOP</b> /Cysr. <b>TBMP</b>                                           | 5:5                       | Crys. <b>TBOP</b> /Cysr. <b>TBMP</b>                                           |
| 6:4                      | Amor. <b>TBOP</b> /Amor. <b>TBMP</b>   | 6:4                       | Crys. <b>TBOP</b> /Cysr. <b>TBMP</b>                                           | 6:4                       | Crys. <b>TBOP</b> /Cysr. <b>TBMP</b>                                           |
| 7:3                      | Amor. <b>TBOP</b> /Amor. <b>TBMP</b>   | 7:3                       | Crys. <b>TBOP</b> /Amor. <b>TBMP</b>                                           | 7:3                       | Crys. <b>TBOP</b> /Amor. <b>TBMP</b>                                           |
| 2:8                      | Amor. <b>TBOP</b> /Amor. <b>TBMP</b>   | 2:8                       | Amor. <b>TBOP</b> +Cysr. <b>TBOP</b> /<br>Amor. <b>TBMP</b> +Cysr. <b>TBMP</b> | 2:8                       | Amor. <b>TBOP</b> +Cysr. <b>TBOP</b> /<br>Amor. <b>TBMP</b> +Cysr. <b>TBMP</b> |
| 0:1                      | Amor. <b>TBOP</b> / Amor. <b>TBMP</b>  |                           |                                                                                |                           |                                                                                |

Amor. is the abbreviation of amorphous; Crys. is the abbreviation of crystalline.

**Table S2**  $\pi\cdots\pi$  interactions in **PHZMP** crystals.

| D-H $\cdots$ Cg       | H $\cdots$ Cg / Å | X-H $\cdots$ Cg / ° | X-H, Cg / ° | X $\cdots$ Cg / Å |
|-----------------------|-------------------|---------------------|-------------|-------------------|
| C5-H5 $\cdots$ Cg4    | 2.62              | 131                 | 47          | 3.307             |
| C10-H10 $\cdots$ Cg2  | 2.86              | 136                 | 56          | 3.5894            |
| C14-H14A $\cdots$ Cg4 | 2.78              | 115                 | 37          | 3.308             |
| C14-H14B $\cdots$ Cg4 | 2.91              | 105                 | 34          | 3.308             |
| C18-H18 $\cdots$ Cg1  | 2.88              | 124                 | 49          | 3.489             |
| C25-H25 $\cdots$ Cg3  | 2.98              | 132                 | 54          | 3.672             |
| C27-H27 $\cdots$ Cg3  | 2.63              | 142                 | 51          | 3.412             |
| C27-H27 $\cdots$ Cg1  | 3.039             | 130                 | 67          | 3.711             |

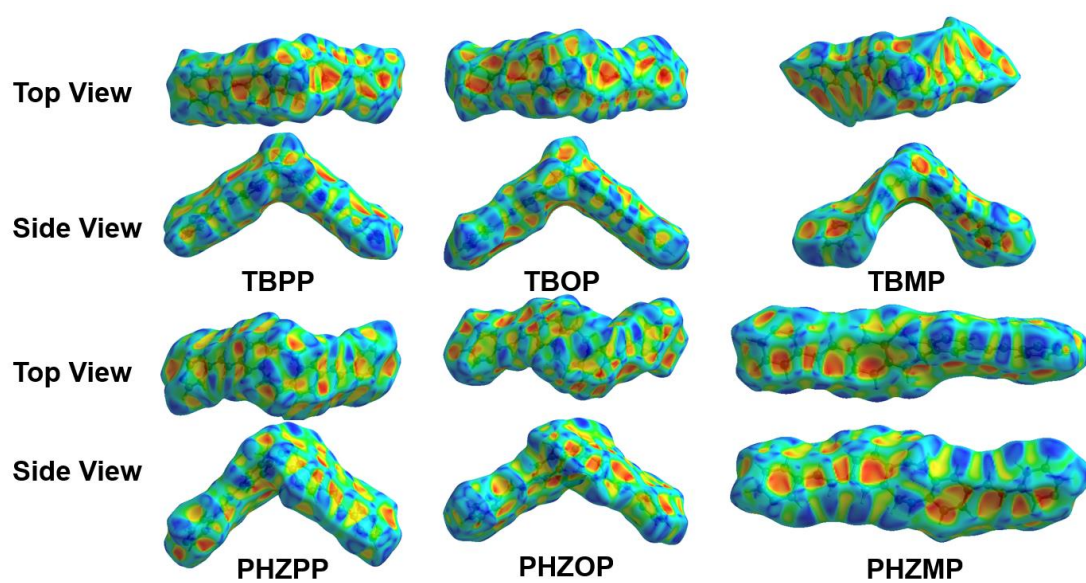**Fig. S1** Hirshfeld surface of **TBPP**, **TBOP**, **TBMP**, **PHZPP**, **PHZOP**, and **PHZMP** mapped with  $d_{\text{norm}}$ .
